# Supplementary material for: Lonicera japonica Thunb. as a promising antibacterial agent for Bacillus cereus ATCC14579 based on network pharmacology, metabolomics, and in vitro experiments
Source: Royal Society of Chemistry journal article supplement (doi:10.1039/d3ra00802a), 2023-01-01
Supplement: d3ra00802a2.pdf [file d3ra00802a2.pdf]

Table S1 Basic information of 27 potentially active ingredients in Honeysuckle

| No | Potential active ingredients | OB/%  | DL   | Chemical formula                                 |
|----|------------------------------|-------|------|--------------------------------------------------|
| 1  | Luteolin                     | 36.16 | 0.25 | C <sub>15</sub> H <sub>10</sub> O <sub>6</sub>   |
| 2  | β-sitosterol                 | 36.91 | 0.75 | C <sub>29</sub> H <sub>50</sub> O                |
| 3  | β-carotene                   | 37.18 | 0.58 | C <sub>40</sub> H <sub>56</sub>                  |
| 4  | Flavanone                    | 41.35 | 0.24 | C <sub>15</sub> H <sub>12</sub> O <sub>2</sub>   |
| 5  | Kaempferol                   | 41.88 | 0.24 | C <sub>15</sub> H <sub>10</sub> O <sub>6</sub>   |
| 6  | Mandenol                     | 42    | 0.19 | C <sub>20</sub> H <sub>36</sub> O <sub>2</sub>   |
| 7  | Phytofluene                  | 43.18 | 0.5  | C <sub>40</sub> H <sub>62</sub>                  |
| 8  | Stigmasterol                 | 43.83 | 0.76 | C <sub>29</sub> H <sub>48</sub> O                |
| 9  | Ethyl linolenate             | 46.1  | 0.2  | C <sub>20</sub> H <sub>34</sub> O <sub>2</sub>   |
| 10 | 7-epi-vogeloside             | 46.13 | 0.58 | C <sub>10</sub> H <sub>24</sub> O <sub>10</sub>  |
| 11 | Quercetin                    | 46.43 | 0.28 | C <sub>15</sub> H <sub>10</sub> O <sub>7</sub>   |
| 12 | Kryptoxanthin                | 47.25 | 0.57 | C <sub>40</sub> H <sub>56</sub> O                |
| 13 | Centauroside                 | 55.79 | 0.5  | C <sub>22</sub> H <sub>26</sub> O <sub>9</sub>   |
| 14 | Chlorogenic acid             | 13.61 | 0.31 | C <sub>16</sub> H <sub>18</sub> O <sub>9</sub>   |
| 15 | Neochlorogenic acid          | 10.65 | 0.33 | C <sub>16</sub> H <sub>18</sub> O <sub>9</sub>   |
| 16 | Isochlorogenic acid A        | 1.79  | 0.69 | C <sub>25</sub> H <sub>24</sub> O <sub>12</sub>  |
| 17 | Isochlorogenic acid B        | 1.78  | 0.69 | C <sub>25</sub> H <sub>24</sub> O <sub>12</sub>  |
| 18 | Isochlorogenic acid C        | 1.78  | 0.69 | C <sub>25</sub> H <sub>24</sub> O <sub>12</sub>  |
| 19 | Caffeic acid                 | 54.97 | 0.05 | C <sub>9</sub> H <sub>8</sub> O <sub>4</sub>     |
| 20 | Luteoloside                  | 7.29  | 0.78 | C <sub>21</sub> H <sub>20</sub> O <sub>11</sub>  |
| 21 | Methyl caffeate              | 60.68 | 0.06 | C <sub>10</sub> H <sub>10</sub> O <sub>4</sub>   |
| 22 | Quinic acid                  | 55.92 | 0.06 | C <sub>7</sub> H <sub>12</sub> O <sub>6</sub>    |
| 23 | Macranthoidin A              | 4.15  | 0.01 | C <sub>59</sub> H <sub>96</sub> O <sub>27</sub>  |
| 24 | Macranthoidin B              | 6.69  | 0.01 | C <sub>65</sub> H <sub>106</sub> O <sub>32</sub> |
| 25 | Loganin                      | 5.9   | 0.44 | C <sub>17</sub> H <sub>26</sub> O <sub>10</sub>  |
| 26 | Cryptochlorogenic acid       | -     | -    | C <sub>16</sub> H <sub>18</sub> O <sub>9</sub>   |
| 27 | Dipsacoside B                |       |      | C <sub>53</sub> H <sub>86</sub> O <sub>22</sub>  |
| 28 | Sweroside                    | -     | -    | C <sub>16</sub> H <sub>22</sub> O <sub>9</sub>   |

Table S2 Minimum antibacterial concentration (MIC) of 5 active ingredients of Honeysuckle

| Drug             | MIC ( $\mu\text{g/mL}$ ) |
|------------------|--------------------------|
| Luteolin         | 15.625                   |
| Quercetin        | 31.25                    |
| Kaempferol       | 15.625                   |
| Chlorogenic acid | >1000                    |
| Macranthoidin B  | >1000                    |
