# Supplementary figures and images for: Lonicera japonica Thunb. as a promising antibacterial agent for Bacillus cereus ATCC14579 based on network pharmacology, metabolomics, and in vitro experiments
Source: Royal Society of Chemistry journal article supplement (doi:10.1039/d3ra00802a), 2023-01-01

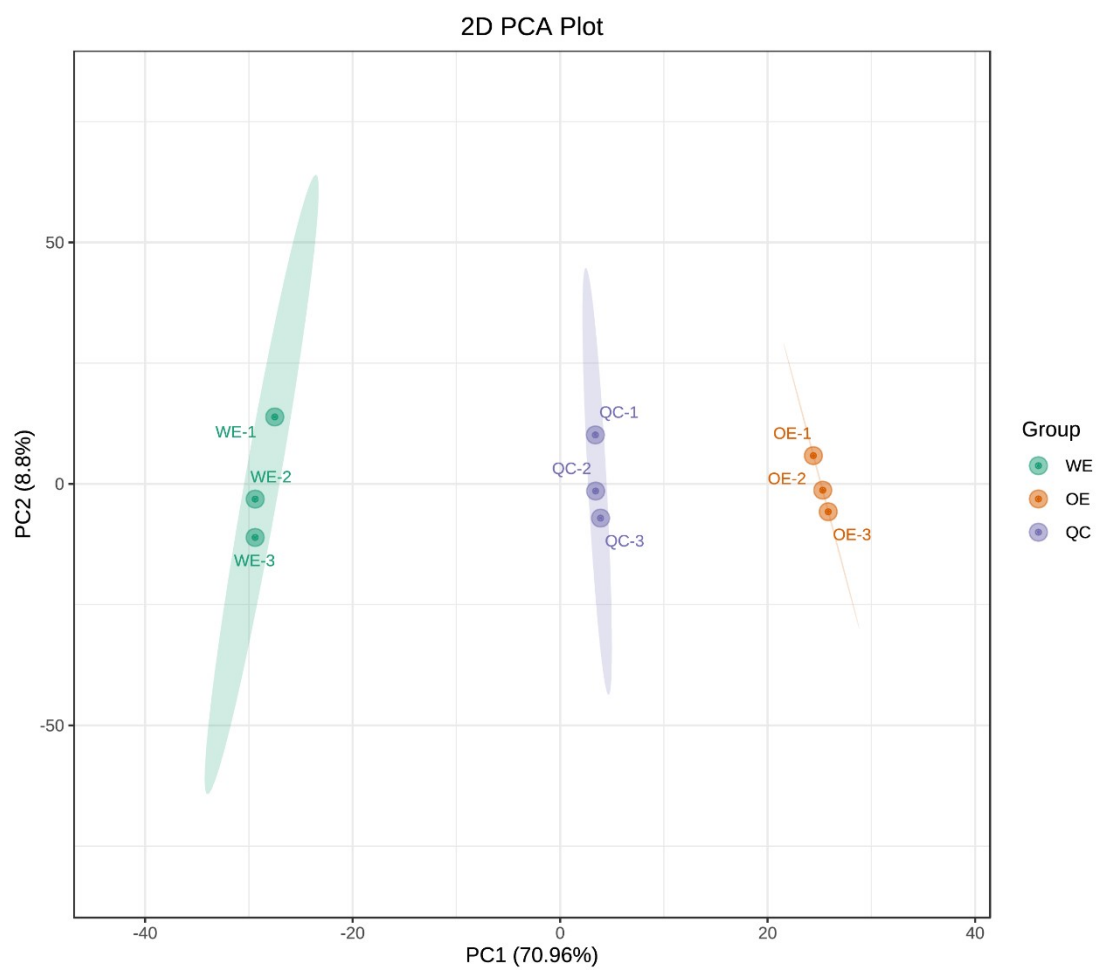

Supplementary Figure 1



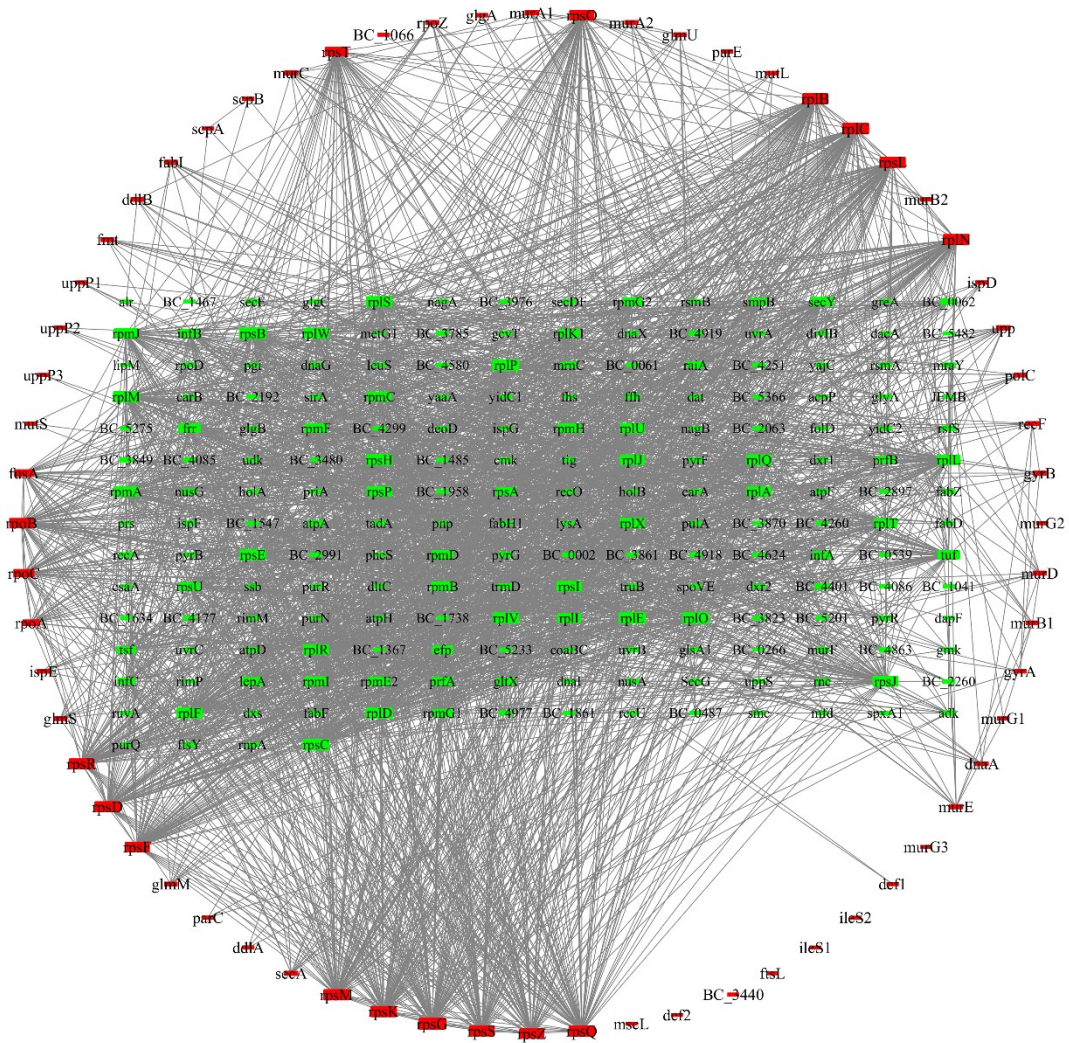

Supplementary Figure 3

Supplement: d3ra00802a1.pdf [file d3ra00802a1.pdf]
